# Supplementary material for: Regulation of substrate utilization and adiposity by Agrp neurons
Source: PubMed Central journal article supplement (PMC6338802; doi:10.1038/s41467-018-08239-x), 2019-01-18
Supplement: 41467_2018_8239_MOESM1_ESM.pdf [file 41467_2018_8239_MOESM1_ESM.pdf]

**Supplementary Material for “Regulation of substrate utilization and adiposity by Agrp neurons”**

**Cavalcanti-de-Albuquerque et al.**

**Supplementary Notes 1-3  
Supplementary Figure 1-6  
Supplementary References**

### Supplementary Note 1

We characterized the effects of glucose ingestion on metabolism. We provided different concentrations of glucose to mice via gavage delivery, thereby ruling out potential cephalic phase effects (**Supplementary Fig. S2a**). Gavage infusion of glucose led to dose-dependent increases in RER (**Supplementary Fig. S2b**;  $r^2 = 0.99$ ,  $P = 0.003$ ), decreases in fat utilization (**Supplementary Fig. S2c**;  $r^2 = 0.99$ ,  $P = 0.004$ ), and increases in carbohydrate utilization (**Supplementary Fig. S2d**;  $r^2 = 0.99$ ,  $P = 0.003$ ). These metabolic shifts were mainly due to increases in  $VCO_2$  (**Supplementary Fig. S2f**;  $r^2 = 0.98$ ,  $P = 0.006$ ) and not  $VO_2$  (**Supplementary Fig. S2e**;  $r^2 = 0.84$ ,  $P = 0.07$ ). Glucose intake also positively correlated with energy expenditure (**Supplementary Fig. S2g**;  $r^2 = 0.92$ ,  $P = 0.03$ ), likely due to the thermic effects of carbohydrate digestion. Activity levels were unchanged (**Supplementary Fig. S2d**;  $r^2 = 0.58$ ,  $P = 0.23$ ). These experiments demonstrate that small amounts of glucose ingestion alone are sufficient to shift metabolism even in the absence of carbohydrate sensing at the level of the mouth.

### Supplementary Note 2

We micro-injected the arcuate nucleus of adult *Agrp*<sup>Cre</sup> mice with an adeno-associated virus (AAV) carrying a *Cre*-dependent construct to express hM3Dq (AAV-DIO-hM3D(Gq)-mCherry; see Material and Methods and **Supplementary Fig. S3a**). We first confirmed the increased feeding response upon peripheral injection of clozapine-N-oxide in *Agrp*<sup>hM3Dq</sup> mice (CNO, i.p.; **Supplementary Fig. S3b**). In indirect calorimetry chambers, activation of *Agrp* neurons in *Agrp*<sup>hM3Dq</sup> mice led to metabolic shifts towards carbohydrate utilization related to fat utilization (**Supplementary Fig. S3d-j**), similarly to what we found in *Agrp*<sup>Trpv1</sup> mice, but with a delayed latency as expected by the use of this tool<sup>1,2</sup> compared to *Trpv1*-mediated neuron activation<sup>3,4,5</sup>.

### Supplementary Note 3

Three weeks after the injection of an AAV carrying a conditional construct to express hM3Dq in *Agrp*<sup>Cre</sup> mice, we confirmed mice responded to CNO injection by measuring their feeding response (**Supplementary Fig. 5a**). After a period of washout, we switched mice to a high-fat diet for four days controlling their caloric ingestion (**Supplementary Fig. 5b**). Mice received daily injections of CNO (at ZT 11.0, i.p.). Similar to *Agrp*<sup>Trpv1</sup> mice (**Fig. 6**), activation of *Agrp* neurons in *Agrp*<sup>hM3Dq</sup> mice during controlled hyperphagia led to increased body weight gain (**Supplementary Fig. 5c**), metabolic efficiency (**Supplementary Fig. 5d**) and gain in fat mass (**Supplementary Fig. 5e**).

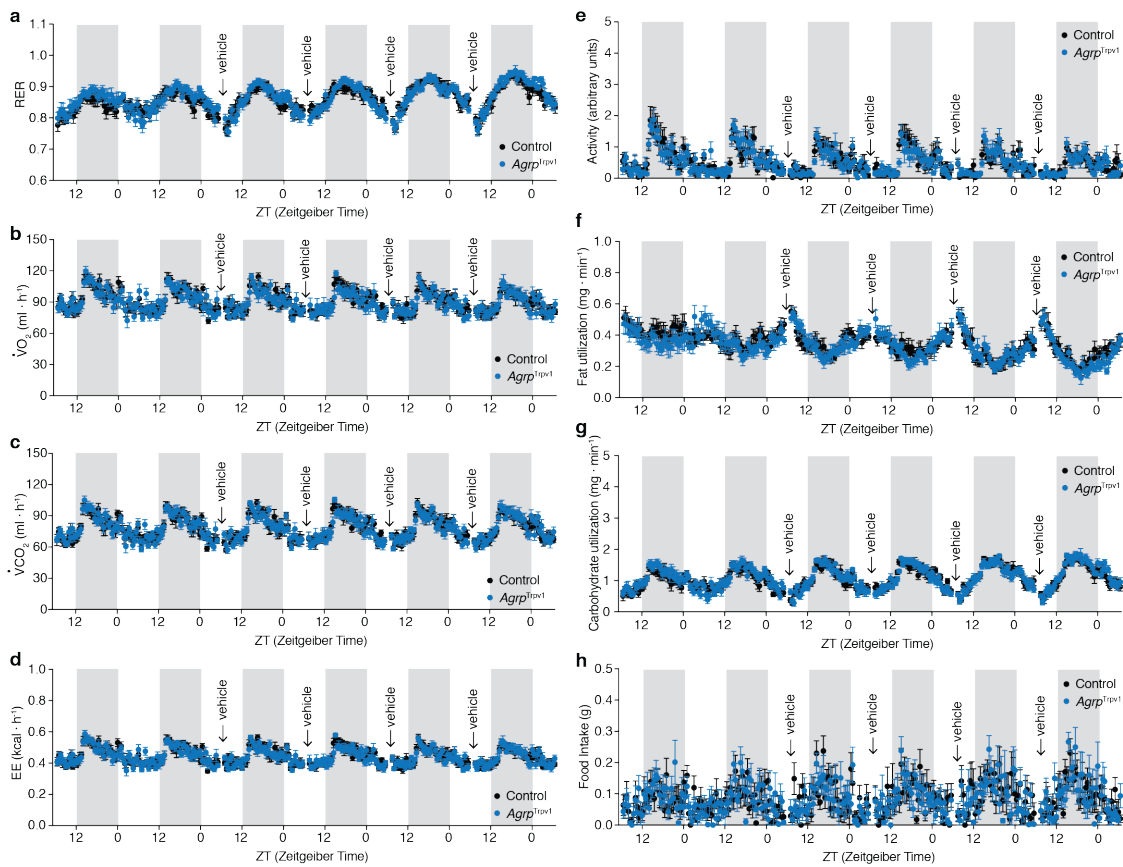

**Supplementary Figure 1: Baseline calorimetry data in control and *Agrp<sup>Trpv1</sup>* mice.**

Control (black; n = 8) and *Agrp<sup>Trpv1</sup>* mice (blue; n = 8) were acclimated to indirect calorimetry chambers before injection with capsaicin. The panels represent the last two days of acclimation followed by 4 days of acclimation to vehicle injection (i.p.). Injections were performed during the light cycle at the same time as capsaicin injection (see Fig. 1). **(a)** RER. **(b)**  $\dot{V}O_2$ . **(c)**  $\dot{V}CO_2$ . **(d)** Energy expenditure. **(e)** Ambulatory activity. **(f)** Calculated fat utilization. **(g)** Calculated carbohydrate utilization. **(h)** Food intake. Grey shadows indicate dark cycle. Arrows indicate time of injection. Symbols indicate mean  $\pm$  SEM.

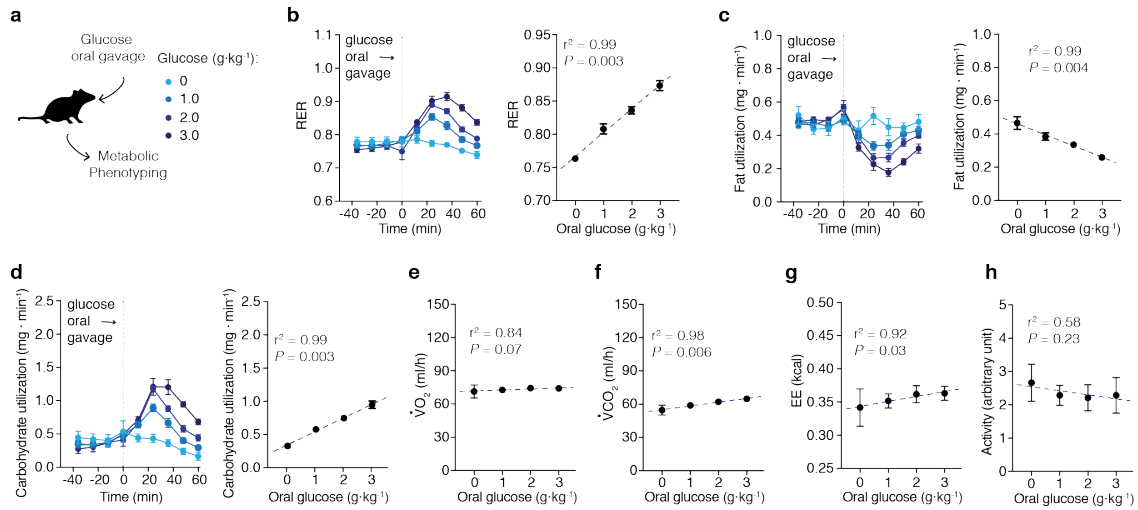

### Supplementary Figure 2: Acute effects of glucose on metabolism.

(a) Mice received a bolus of saline or glucose solution (1, 2, or 3 g kg<sup>-1</sup> body weight dissolved in saline) via gavage. (b) RER. (c) Calculated fat utilization. (d) Calculated carbohydrate utilization. (e)  $\dot{V}O_2$ . (f)  $\dot{V}CO_2$ . (g) Energy expenditure. (h) Activity levels. Saline (n = 7); glucose 1 g/kg (n = 12); glucose 2 g kg<sup>-1</sup> (n = 16); and glucose 3 g kg<sup>-1</sup> (n = 8). Symbols represent mean  $\pm$  SEM. Grey dashed line indicates time of oral gavage. In the linear correlation panels, symbols indicate mean of all mice in the given group  $\pm$  SEM; dashed red line represents the linear regression model;  $r^2$  and  $P$  values are plotted in each panel.

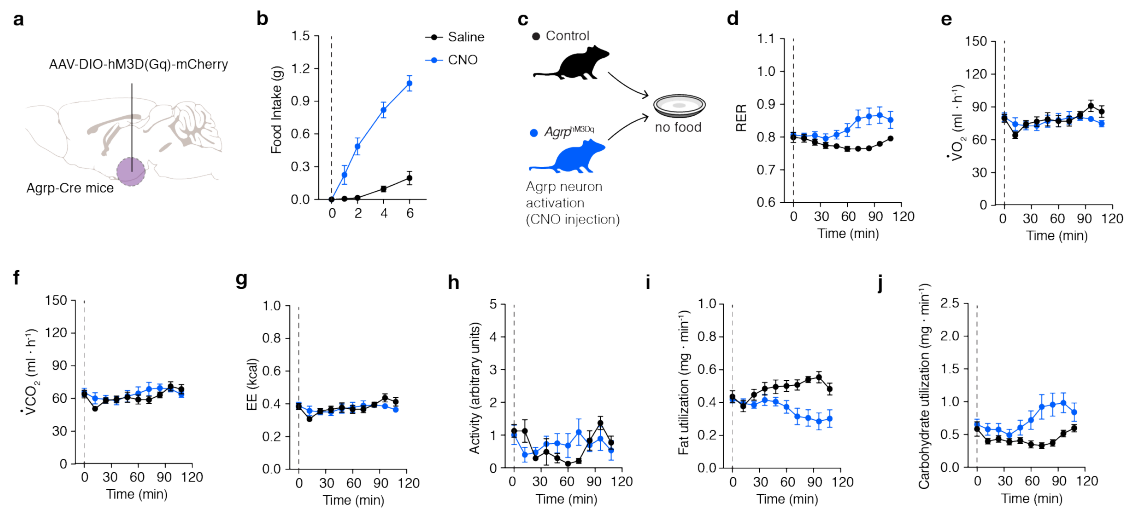

### Supplementary Figure 3: Activation of *Agrp* neurons induces a shift in whole-body substrate utilization.

(a) An AAV-DIO-hM3D(Gq)-mCherry was injected in the arcuate nucleus of adult male *Agrp*<sup>Cre</sup> mice. Animals were randomly injected with saline ( $n = 5$ ) or CNO ( $1 \text{ mg kg}^{-1}$ , i.p.;  $n = 5$ ). (b) Food intake (interaction:  $F_{4,40} = 45.91$ ,  $P < 0.0001$ ; time:  $F_{4,40} = 94.51$ ,  $P < 0.0001$ ; and group:  $F_{1,10} = 60.36$ ,  $P < 0.0001$ ). (c) Control (*Agrp*<sup>hM3Dq</sup> mice injected with saline) and *Agrp*<sup>hM3Dq</sup> mice injected with CNO were tested in calorimetry chambers in the absence of food. (d) RER (interaction:  $F_{9,90} = 4.97$ ,  $P < 0.0001$ ; time:  $F_{9,90} = 3.07$ ,  $P = 0.002$ ; and group:  $F_{1,10} = 9.90$ ,  $P = 0.01$ ). (e)  $\text{VO}_2$  (interaction:  $F_{9,90} = 2.32$ ,  $P = 0.02$ ; time:  $F_{9,90} = 4.44$ ,  $P < 0.001$ ; and group:  $F_{1,10} = 0.12$ ,  $P = 0.73$ ). (f)  $\text{VCO}_2$  (interaction:  $F_{9,90} = 1.73$ ,  $P = 0.09$ ; time:  $F_{9,90} = 5.41$ ,  $P < 0.0001$ ; and group:  $F_{1,10} = 0.36$ ,  $P = 0.56$ ). (g) Energy expenditure (interaction:  $F_{9,90} = 2.17$ ,  $P = 0.03$ ; time:  $F_{9,90} = 4.72$ ,  $P < 0.0001$ ; and group:  $F_{1,10} = 0.02$ ,  $P = 0.87$ ). (h) Ambulatory activity (interaction:  $F_{9,90} = 1.90$ ,  $P = 0.06$ ; time:  $F_{9,90} = 1.96$ ,  $P = 0.05$ ; and group:  $F_{1,10} = 0.15$ ,  $P = 0.70$ ). (i) Calculated fat utilization (interaction:  $F_{9,90} = 6.53$ ,  $P < 0.0001$ ; time:  $F_{9,90} = 1.37$ ,  $P = 0.21$ ; and group:  $F_{1,10} = 9.97$ ,  $P = 0.01$ ). (j) Calculated carbohydrate utilization (interaction:  $F_{9,90} = 3.96$ ,  $P = 0.0003$ ; time:  $F_{9,90} = 4.60$ ,  $P < 0.0001$ ; and group:  $F_{1,10} = 7.30$ ,  $P = 0.02$ ). Statistical analysis was performed using two-way ANOVA with time as a repeated-measure followed by Holm-Sidak's multiple comparisons test (MCT). MCTs are not displayed in the figures. Dashed lines indicate time of saline or CNO injection. Symbols indicate mean  $\pm$  SEM.

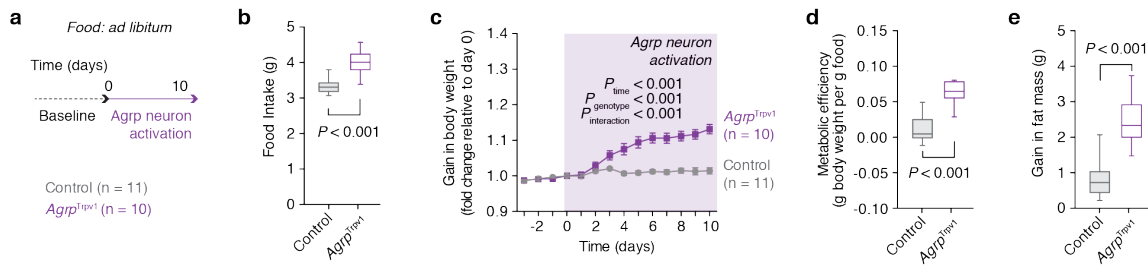

#### Supplementary Figure 4:

(a) Protocol used in the *ad libitum* studies; after baseline, control and *Agrp*<sup>Trpv1</sup> mice were injected with capsaicin (10 mg kg<sup>-1</sup>; i.p.) for 10 days at 5:00 PM; food was provided *ad libitum*. (b) Average daily food intake over the 10-days period of capsaicin injection. (c) Gain in body weight relative to the first day of capsaicin injection. (d) Metabolic efficiency, calculated as the delta body weight minus total food intake during the 10-days period of capsaicin injection. (e) Gain in fat mass, calculated by the differences in fat mass after the period of neuron activation, using MRI to measure body composition. Two-way ANOVA with time as a repeated measure was used in (c). Unpaired *t* test was used in (b), (d) and (e). Number of mice is displayed in the figure. Symbols indicate mean ± SEM. Boxes indicate median ± 25/75 quartiles ± min/max values. *P* values are provided in the figures.

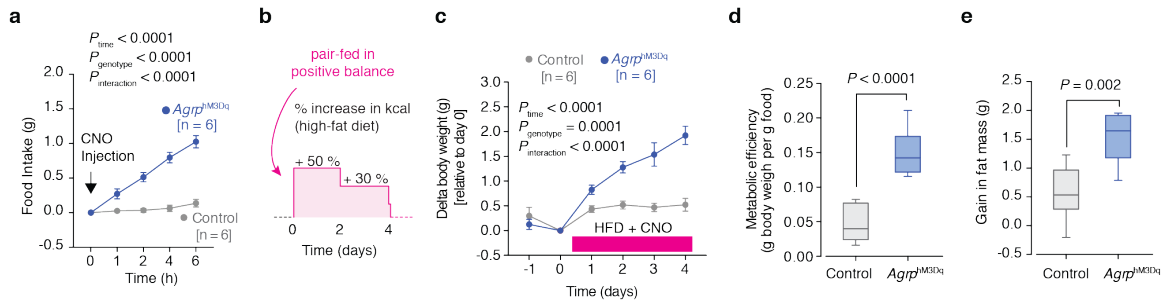

**Supplementary Figure 5: Activation of *Agrp* neurons with hM3Dq recapitulates the effects of *Agrp*<sup>Trpv1</sup> mice.**

(a) Food intake after injection of CNO (0.3 mg kg<sup>-1</sup>, i.p.) in control and *Agrp*<sup>hM3Dq</sup> mice. (b) Mice were pair fed in positive energy balance for four days. (c) Delta changes in body weight relative to the day of diet switch. (d) Metabolic efficiency and (e) gain in fat mass during the period in which mice were fed high-fat diet. Two-way ANOVA with time as a repeated measure was used in (a) and (c). Unpaired *t* test was used in (d) and (e). Number of animals is provided in the panels. Symbols represent mean ± SEM. Boxes indicate median ± 25/75 quartiles ± min/max values.

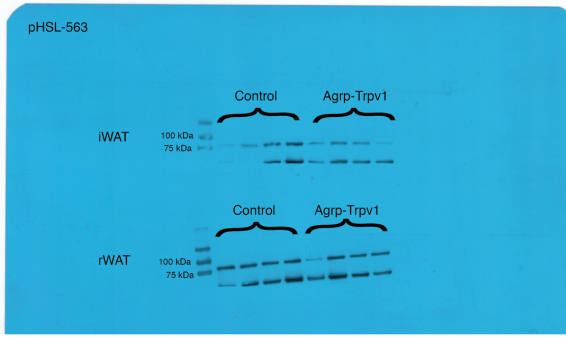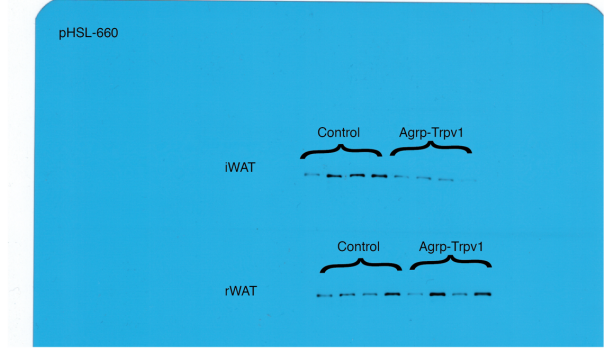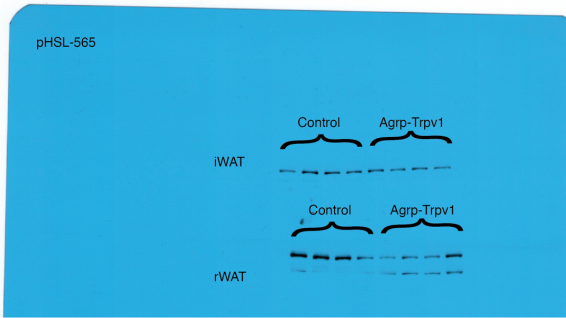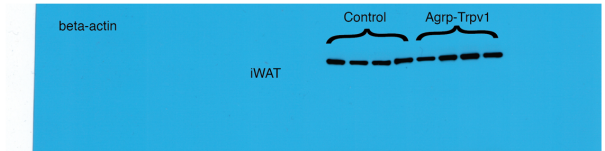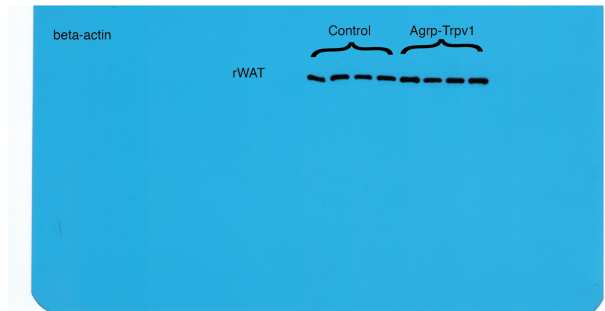

**Supplementary Figure 6: Western blots.**  
Full size (uncut) western blot films.



## Supplementary References

1. Krashes MJ, *et al.* Rapid, reversible activation of AgRP neurons drives feeding behavior in mice. *The Journal of clinical investigation* **121**, 1424-1428 (2011).
2. Krashes MJ, Shah BP, Koda S, Lowell BB. Rapid versus delayed stimulation of feeding by the endogenously released AgRP neuron mediators GABA, NPY, and AgRP. *Cell metabolism* **18**, 588-595 (2013).
3. Arenkiel BR, Klein ME, Davison IG, Katz LC, Ehlers MD. Genetic control of neuronal activity in mice conditionally expressing TRPV1. *Nature methods* **5**, 299-302 (2008).
4. Guler AD, *et al.* Transient activation of specific neurons in mice by selective expression of the capsaicin receptor. *Nature communications* **3**, 746 (2012).
5. Dietrich MO, Zimmer MR, Bober J, Horvath TL. Hypothalamic Agrp Neurons Drive Stereotypic Behaviors beyond Feeding. *Cell* **160**, 1222-1232 (2015).
